# Supplementary material for: Studies of the Formation of Inclusion Complexes Derivatives of Cinnamon Acid with α-Cyclodextrin in a Wide Range of Temperatures Using Conductometric Methods
Source: MDPI journal article supplement (doi:10.3390/molecules27144420), 2022-07-10
Supplement: s1 [file s1]

# Studies of the Formation of Inclusion Complexes Derivatives of Cinnamon Acid with $\alpha$ -Cyclodextrin in a Wide Range of Temperatures Using Conductometric Methods

Zdzisław Kinart <sup>1,\*</sup> and Renato Tomaš <sup>2</sup>

<sup>1</sup> Department of Physical Chemistry, Faculty of Chemistry, University of Lodz, Pomorska 163/165, 90-236 Lodz, Poland

<sup>2</sup> Department of Physical Chemistry, University of Split, Ruđera Boškovića 35, HR-21000 Split, Croatia; renato.tomas@ktf-split.hr

\* Correspondence: zdzislaw.kinart@chemia.uni.lodz.pl

**Table S1.** Densities, viscosities and relative permittivities of pure water at temperatures  $T = (288.15$  to  $318.15)$  K.

| T/K    | $\rho_o / \text{kg} \cdot \text{m}^{-3}$ <sup>a</sup> | $10^3 \cdot \eta / \text{Pa} \cdot \text{s}$ <sup>a</sup> | $\epsilon_r$ <sup>b</sup> |
|--------|-------------------------------------------------------|-----------------------------------------------------------|---------------------------|
| 288.15 | 999.100                                               | 1.138                                                     | 82.07                     |
| 293.15 | 998.205                                               | 1.002                                                     | 80.21                     |
| 298.15 | 997.047                                               | 0.890                                                     | 78.40                     |
| 303.15 | 995.651                                               | 0.797                                                     | 76.62                     |
| 308.15 | 994.038                                               | 0.719                                                     | 74.89                     |
| 313.15 | 992.224                                               | 0.653                                                     | 73.19                     |
| 318.15 | 990.223                                               | 0.596                                                     | 71.53                     |

<sup>a</sup> values for water recommended by the International Association for the Properties of Water and Steam (IAPWS) calculated on the online property calculator ([https://web1.hszg.de/thermo\\_fpc/](https://web1.hszg.de/thermo_fpc/)).

<sup>b</sup> values for water calculated according to the IAPWS recommendations (<http://www.iapws.org/rel-guide/dielec.pdf>).

**Table S2.** The value of molar concentration of salt  $C_{\text{salt}}$  [mol/dm<sup>3</sup>], concentration of ligand  $C_{\text{lig}}$  [mol/dm<sup>3</sup>], molar conductivity  $\Lambda$  [S·cm<sup>2</sup>·mol<sup>-1</sup>] for  $\alpha$ -cyclodextrin with cinnamic acid sodium salt at a given molar fraction of water ( $x_w$ ) in water at  $T = 288.15\text{K}$  at pressure  $p = 0.1\text{ MPa}$ .<sup>a</sup>

| Sodium Salt of Cinnamic Acid |                                             |                                            |                                                        |
|------------------------------|---------------------------------------------|--------------------------------------------|--------------------------------------------------------|
| Nr                           | $C_{\text{salt}}$<br>[mol/dm <sup>3</sup> ] | $C_{\text{lig}}$<br>[mol/dm <sup>3</sup> ] | $\Lambda_m$<br>[S·cm <sup>2</sup> ·mol <sup>-1</sup> ] |
| 1.                           | 0.00269                                     | 0.00000                                    | 73.2734                                                |
| 2.                           | 0.00263                                     | 0.00030                                    | 73.1178                                                |
| 3.                           | 0.00257                                     | 0.00060                                    | 72.8742                                                |
| 4.                           | 0.00251                                     | 0.00091                                    | 72.6399                                                |
| 5.                           | 0.00244                                     | 0.00121                                    | 72.4521                                                |
| 6.                           | 0.00239                                     | 0.00149                                    | 72.2658                                                |
| 7.                           | 0.00232                                     | 0.00181                                    | 71.9855                                                |
| 8.                           | 0.00226                                     | 0.00208                                    | 71.7513                                                |
| 9.                           | 0.00221                                     | 0.00235                                    | 71.5558                                                |
| 10.                          | 0.00214                                     | 0.00270                                    | 71.2835                                                |
| 11.                          | 0.00208                                     | 0.00299                                    | 71.1018                                                |
| 12.                          | 0.00202                                     | 0.00329                                    | 70.8764                                                |
| 13.                          | 0.00195                                     | 0.00359                                    | 70.6802                                                |
| 14.                          | 0.00189                                     | 0.00388                                    | 70.4438                                                |
| 15.                          | 0.00183                                     | 0.00416                                    | 70.2263                                                |
| 16.                          | 0.00177                                     | 0.00448                                    | 70.0045                                                |
| 17.                          | 0.00171                                     | 0.00477                                    | 69.8121                                                |
| 18.                          | 0.00164                                     | 0.00506                                    | 69.6401                                                |

|     |         |         |         |
|-----|---------|---------|---------|
| 19. | 0.00159 | 0.00534 | 69.4027 |
| 20. | 0.00153 | 0.00564 | 69.2034 |
| 21. | 0.00147 | 0.00591 | 68.9945 |
| 22. | 0.00141 | 0.00620 | 68.8742 |
| 23. | 0.00134 | 0.00654 | 68.7909 |

<sup>a</sup>Standard uncertainties are  $u(T) = 0.01$  K,  $u(p) = 0.05$  MPa,  $u(c) = 10^{-4}c$ , and the combined expanded uncertainty is  $U_c(\Lambda) = 0.0005 \cdot \Lambda$  (level of confidence = 0.95).

**Table S3.** The value of molar concentration of salt  $C_{\text{salt}}$  [mol/dm<sup>3</sup>], concentration of ligand  $C_{\text{lig}}$  [mol/dm<sup>3</sup>], molar conductivity  $\Lambda$  [S·cm<sup>2</sup>·mol<sup>-1</sup>] for  $\alpha$ -cyclodextrin with cinnamic acid sodium salt at a given molar fraction of water ( $x_w$ ) in water at T = 293.15K.

| Sodium Salt of Cinnamic Acid |                                             |                                            |                                                        |
|------------------------------|---------------------------------------------|--------------------------------------------|--------------------------------------------------------|
| Nr                           | $C_{\text{salt}}$<br>[mol/dm <sup>3</sup> ] | $C_{\text{lig}}$<br>[mol/dm <sup>3</sup> ] | $\Lambda_m$<br>[S·cm <sup>2</sup> ·mol <sup>-1</sup> ] |
| 1.                           | 0.00288                                     | 0.00000                                    | 87.2346                                                |
| 2.                           | 0.00281                                     | 0.00030                                    | 86.9317                                                |
| 3.                           | 0.00275                                     | 0.00059                                    | 86.7459                                                |
| 4.                           | 0.00268                                     | 0.00089                                    | 86.5075                                                |
| 5.                           | 0.00261                                     | 0.00120                                    | 86.1627                                                |
| 6.                           | 0.00255                                     | 0.00149                                    | 85.7303                                                |
| 7.                           | 0.00248                                     | 0.00179                                    | 85.3416                                                |
| 8.                           | 0.00242                                     | 0.00209                                    | 84.9778                                                |
| 9.                           | 0.00235                                     | 0.00238                                    | 84.6581                                                |
| 10.                          | 0.00229                                     | 0.00267                                    | 84.2786                                                |
| 11.                          | 0.00222                                     | 0.00298                                    | 83.9136                                                |
| 12.                          | 0.00215                                     | 0.00328                                    | 83.6255                                                |
| 13.                          | 0.00209                                     | 0.00356                                    | 83.4177                                                |
| 14.                          | 0.00202                                     | 0.00388                                    | 83.1784                                                |
| 15.                          | 0.00195                                     | 0.00417                                    | 82.9643                                                |
| 16.                          | 0.00189                                     | 0.00447                                    | 82.6906                                                |
| 17.                          | 0.00182                                     | 0.00477                                    | 82.4736                                                |
| 18.                          | 0.00176                                     | 0.00506                                    | 82.2882                                                |
| 19.                          | 0.00169                                     | 0.00535                                    | 82.1220                                                |
| 20.                          | 0.00162                                     | 0.00566                                    | 81.9316                                                |
| 21.                          | 0.00156                                     | 0.00595                                    | 81.6714                                                |
| 22.                          | 0.00149                                     | 0.00625                                    | 81.5324                                                |
| 23.                          | 0.00143                                     | 0.00653                                    | 81.3958                                                |

**Table S4.** The value of molar concentration of salt  $C_{\text{salt}}$  [mol/dm<sup>3</sup>], concentration of ligand  $C_{\text{lig}}$  [mol/dm<sup>3</sup>], molar conductivity  $\Lambda$  [S·cm<sup>2</sup>·mol<sup>-1</sup>] for  $\alpha$ -cyclodextrin with cinnamic acid sodium salt at a given molar fraction of water ( $x_w$ ) in water at T = 298.15K.

| Sodium Salt of Cinnamic Acid |                                             |                                            |                                                        |
|------------------------------|---------------------------------------------|--------------------------------------------|--------------------------------------------------------|
| Nr                           | $C_{\text{salt}}$<br>[mol/dm <sup>3</sup> ] | $C_{\text{lig}}$<br>[mol/dm <sup>3</sup> ] | $\Lambda_m$<br>[S·cm <sup>2</sup> ·mol <sup>-1</sup> ] |
| 1.                           | 0.00291                                     | 0.00000                                    | 98.1387                                                |
| 2.                           | 0.00284                                     | 0.00030                                    | 97.6825                                                |
| 3.                           | 0.00277                                     | 0.00059                                    | 97.1099                                                |
| 4.                           | 0.00271                                     | 0.00088                                    | 96.6581                                                |
| 5.                           | 0.00265                                     | 0.00114                                    | 96.4077                                                |
| 6.                           | 0.00257                                     | 0.00150                                    | 96.0937                                                |
| 7.                           | 0.00250                                     | 0.00179                                    | 95.8108                                                |
| 8.                           | 0.00243                                     | 0.00209                                    | 95.5416                                                |

|     |         |         |         |
|-----|---------|---------|---------|
| 9.  | 0.00237 | 0.00239 | 95.2654 |
| 10. | 0.00230 | 0.00268 | 95.0197 |
| 11. | 0.00223 | 0.00298 | 94.7489 |
| 12. | 0.00217 | 0.00328 | 94.5165 |
| 13. | 0.00210 | 0.00358 | 94.2562 |
| 14. | 0.00203 | 0.00387 | 94.0001 |
| 15. | 0.00197 | 0.00416 | 93.7400 |
| 16. | 0.00190 | 0.00447 | 93.4926 |
| 17. | 0.00184 | 0.00475 | 93.2690 |
| 18. | 0.00178 | 0.00501 | 93.0345 |
| 19. | 0.00171 | 0.00532 | 92.8006 |
| 20. | 0.00164 | 0.00561 | 92.4950 |
| 21. | 0.00157 | 0.00594 | 92.2153 |
| 22. | 0.00151 | 0.00619 | 92.0167 |
| 23. | 0.00145 | 0.00644 | 91.7749 |

**Table S5.** The value of molar concentration of salt  $C_{\text{salt}}$  [mol/dm<sup>3</sup>], concentration of ligand  $C_{\text{lig}}$  [mol/dm<sup>3</sup>], molar conductivity  $\Lambda$  [S·cm<sup>2</sup>·mol<sup>-1</sup>] for  $\alpha$ -cyclodextrin with cinnamic acid sodium salt at a given molar fraction of water ( $x_w$ ) in water at T = 303.15K.

| Sodium Salt of Cinnamic Acid |                                             |                                            |                                                        |
|------------------------------|---------------------------------------------|--------------------------------------------|--------------------------------------------------------|
| Nr                           | $C_{\text{salt}}$<br>[mol/dm <sup>3</sup> ] | $C_{\text{lig}}$<br>[mol/dm <sup>3</sup> ] | $\Lambda_m$<br>[S·cm <sup>2</sup> ·mol <sup>-1</sup> ] |
| 1.                           | 0.00292                                     | 0.00000                                    | 108.1296                                               |
| 2.                           | 0.00285                                     | 0.00029                                    | 107.7095                                               |
| 3.                           | 0.00278                                     | 0.00060                                    | 107.4119                                               |
| 4.                           | 0.00271                                     | 0.00092                                    | 107.0464                                               |
| 5.                           | 0.00265                                     | 0.00119                                    | 106.7432                                               |
| 6.                           | 0.00259                                     | 0.00146                                    | 106.3876                                               |
| 7.                           | 0.00251                                     | 0.00178                                    | 105.8817                                               |
| 8.                           | 0.00245                                     | 0.00208                                    | 105.4283                                               |
| 9.                           | 0.00238                                     | 0.00239                                    | 104.9864                                               |
| 10.                          | 0.00231                                     | 0.00267                                    | 104.5927                                               |
| 11.                          | 0.00225                                     | 0.00295                                    | 104.2338                                               |
| 12.                          | 0.00217                                     | 0.00330                                    | 103.8056                                               |
| 13.                          | 0.00211                                     | 0.00357                                    | 103.5472                                               |
| 14.                          | 0.00205                                     | 0.00385                                    | 103.1529                                               |
| 15.                          | 0.00198                                     | 0.00416                                    | 102.8244                                               |
| 16.                          | 0.00191                                     | 0.00445                                    | 102.5493                                               |
| 17.                          | 0.00185                                     | 0.00473                                    | 102.1688                                               |
| 18.                          | 0.00178                                     | 0.00505                                    | 101.7869                                               |
| 19.                          | 0.00171                                     | 0.00536                                    | 101.3329                                               |
| 20.                          | 0.00165                                     | 0.00563                                    | 100.9962                                               |
| 21.                          | 0.00158                                     | 0.00593                                    | 100.5672                                               |
| 22.                          | 0.00152                                     | 0.00620                                    | 100.1848                                               |
| 23.                          | 0.00145                                     | 0.00652                                    | 99.6309                                                |

**Table S6.** The value of molar concentration of salt  $C_{\text{salt}}$  [mol/dm<sup>3</sup>], concentration of ligand  $C_{\text{lig}}$  [mol/dm<sup>3</sup>], molar conductivity  $\Lambda$  [S·cm<sup>2</sup>·mol<sup>-1</sup>] for  $\alpha$ -cyclodextrin with cinnamic acid sodium salt at a given molar fraction of water ( $x_w$ ) in water at T = 308.15K.

| Sodium Salt of Cinnamic Acid |                                             |                                            |                                                        |
|------------------------------|---------------------------------------------|--------------------------------------------|--------------------------------------------------------|
| Nr                           | $C_{\text{salt}}$<br>[mol/dm <sup>3</sup> ] | $C_{\text{lig}}$<br>[mol/dm <sup>3</sup> ] | $\Lambda_m$<br>[S·cm <sup>2</sup> ·mol <sup>-1</sup> ] |
| 1.                           | 0.00287                                     | 0.00000                                    | 119.2278                                               |
| 2.                           | 0.00281                                     | 0.00030                                    | 118.2364                                               |
| 3.                           | 0.00276                                     | 0.00058                                    | 117.2351                                               |
| 4.                           | 0.00270                                     | 0.00088                                    | 116.1811                                               |
| 5.                           | 0.00264                                     | 0.00121                                    | 115.0497                                               |
| 6.                           | 0.00259                                     | 0.00148                                    | 114.1814                                               |
| 7.                           | 0.00253                                     | 0.00178                                    | 113.2525                                               |
| 8.                           | 0.00248                                     | 0.00207                                    | 112.6112                                               |
| 9.                           | 0.00242                                     | 0.00237                                    | 111.9282                                               |
| 10.                          | 0.00236                                     | 0.00266                                    | 111.284                                                |
| 11.                          | 0.00231                                     | 0.00294                                    | 110.7565                                               |
| 12.                          | 0.00225                                     | 0.00324                                    | 110.2212                                               |
| 13.                          | 0.00220                                     | 0.00354                                    | 109.7342                                               |
| 14.                          | 0.00214                                     | 0.00385                                    | 109.3303                                               |
| 15.                          | 0.00208                                     | 0.00416                                    | 108.9881                                               |
| 16.                          | 0.00202                                     | 0.00446                                    | 108.749                                                |
| 17.                          | 0.00197                                     | 0.00475                                    | 108.4971                                               |
| 18.                          | 0.00191                                     | 0.00504                                    | 108.3266                                               |
| 19.                          | 0.00185                                     | 0.00534                                    | 108.098                                                |
| 20.                          | 0.00180                                     | 0.00563                                    | 107.9266                                               |
| 21.                          | 0.00174                                     | 0.00592                                    | 107.8125                                               |
| 22.                          | 0.00168                                     | 0.00623                                    | 107.6533                                               |
| 23.                          | 0.00163                                     | 0.00651                                    | 107.5427                                               |

**Table S7.** The value of molar concentration of salt  $C_{\text{salt}}$  [mol/dm<sup>3</sup>], concentration of ligand  $C_{\text{lig}}$  [mol/dm<sup>3</sup>], molar conductivity  $\Lambda$  [S·cm<sup>2</sup>·mol<sup>-1</sup>] for  $\alpha$ -cyclodextrin with caffeic acid sodium salt at a given molar fraction of water ( $x_w$ ) in water at T = 288.15K.

| Sodium Salt of Caffeic Acid |                                             |                                            |                                                        |
|-----------------------------|---------------------------------------------|--------------------------------------------|--------------------------------------------------------|
| Nr                          | $C_{\text{salt}}$<br>[mol/dm <sup>3</sup> ] | $C_{\text{lig}}$<br>[mol/dm <sup>3</sup> ] | $\Lambda_m$<br>[S·cm <sup>2</sup> ·mol <sup>-1</sup> ] |
| 1.                          | 0.00300                                     | 0.00000                                    | 50.6381                                                |
| 2.                          | 0.00293                                     | 0.00029                                    | 50.5251                                                |
| 3.                          | 0.00286                                     | 0.00062                                    | 50.3889                                                |
| 4.                          | 0.00279                                     | 0.00089                                    | 50.3049                                                |
| 5.                          | 0.00273                                     | 0.00119                                    | 50.1812                                                |
| 6.                          | 0.00265                                     | 0.00151                                    | 50.0858                                                |
| 7.                          | 0.00259                                     | 0.00179                                    | 49.9763                                                |
| 8.                          | 0.00252                                     | 0.00210                                    | 49.8878                                                |
| 9.                          | 0.00244                                     | 0.00238                                    | 49.7987                                                |
| 10.                         | 0.00238                                     | 0.00270                                    | 49.6881                                                |
| 11.                         | 0.00232                                     | 0.00298                                    | 49.5579                                                |
| 12.                         | 0.00225                                     | 0.00328                                    | 49.4809                                                |
| 13.                         | 0.00218                                     | 0.00359                                    | 49.3567                                                |
| 14.                         | 0.00212                                     | 0.00388                                    | 49.2799                                                |
| 15.                         | 0.00205                                     | 0.00418                                    | 49.2217                                                |
| 16.                         | 0.00198                                     | 0.00446                                    | 49.1618                                                |

|     |         |         |         |
|-----|---------|---------|---------|
| 17. | 0.00191 | 0.00478 | 49.1231 |
| 18. | 0.00184 | 0.00508 | 49.0872 |
| 19. | 0.00177 | 0.00538 | 49.0595 |
| 20. | 0.00171 | 0.00565 | 49.0386 |
| 21. | 0.00164 | 0.00597 | 49.0178 |
| 22. | 0.00157 | 0.00626 | 48.9925 |
| 23. | 0.00151 | 0.00656 | 48.9811 |

**Table S8.** The value of molar concentration of salt  $C_{\text{salt}}$  [mol/dm<sup>3</sup>], concentration of ligand  $C_{\text{lig}}$  [mol/dm<sup>3</sup>], molar conductivity  $\Lambda$  [S·cm<sup>2</sup>·mol<sup>-1</sup>] for  $\alpha$ -cyclodextrin with caffeic acid sodium salt at a given molar fraction of water ( $x_w$ ) in water at T = 293.15K.

| Sodium Salt of Caffeic Acid |                                             |                                            |                                                        |
|-----------------------------|---------------------------------------------|--------------------------------------------|--------------------------------------------------------|
| Nr                          | $C_{\text{salt}}$<br>[mol/dm <sup>3</sup> ] | $C_{\text{lig}}$<br>[mol/dm <sup>3</sup> ] | $\Lambda_m$<br>[S·cm <sup>2</sup> ·mol <sup>-1</sup> ] |
| 1.                          | 0.00302                                     | 0.00000                                    | 57.6381                                                |
| 2.                          | 0.00295                                     | 0.00030                                    | 57.5251                                                |
| 3.                          | 0.00288                                     | 0.00060                                    | 57.3889                                                |
| 4.                          | 0.00281                                     | 0.00091                                    | 57.3049                                                |
| 5.                          | 0.00275                                     | 0.00120                                    | 57.1812                                                |
| 6.                          | 0.00268                                     | 0.00150                                    | 57.0858                                                |
| 7.                          | 0.00261                                     | 0.00178                                    | 56.9763                                                |
| 8.                          | 0.00253                                     | 0.00212                                    | 56.8878                                                |
| 9.                          | 0.00247                                     | 0.00240                                    | 56.7987                                                |
| 10.                         | 0.00240                                     | 0.00270                                    | 56.6881                                                |
| 11.                         | 0.00233                                     | 0.00299                                    | 56.5579                                                |
| 12.                         | 0.00227                                     | 0.00328                                    | 56.4809                                                |
| 13.                         | 0.00219                                     | 0.00359                                    | 56.3567                                                |
| 14.                         | 0.00213                                     | 0.00387                                    | 56.2799                                                |
| 15.                         | 0.00206                                     | 0.00417                                    | 56.2217                                                |
| 16.                         | 0.00199                                     | 0.00447                                    | 56.1618                                                |
| 17.                         | 0.00192                                     | 0.00478                                    | 56.1231                                                |
| 18.                         | 0.00185                                     | 0.00507                                    | 56.0872                                                |
| 19.                         | 0.00179                                     | 0.00537                                    | 56.0595                                                |
| 20.                         | 0.00172                                     | 0.00566                                    | 56.0386                                                |
| 21.                         | 0.00165                                     | 0.00594                                    | 56.0178                                                |
| 22.                         | 0.00158                                     | 0.00625                                    | 55.9925                                                |
| 23.                         | 0.00152                                     | 0.00653                                    | 55.9811                                                |

**Table S9.** The value of molar concentration of salt  $C_{\text{salt}}$  [mol/dm<sup>3</sup>], concentration of ligand  $C_{\text{lig}}$  [mol/dm<sup>3</sup>], molar conductivity  $\Lambda$  [S·cm<sup>2</sup>·mol<sup>-1</sup>] for  $\alpha$ -cyclodextrin with caffeic acid sodium salt at a given molar fraction of water ( $x_w$ ) in water at T = 298.15K.

| Sodium Salt of Caffeic Acid |                                             |                                            |                                                        |
|-----------------------------|---------------------------------------------|--------------------------------------------|--------------------------------------------------------|
| Nr                          | $C_{\text{salt}}$<br>[mol/dm <sup>3</sup> ] | $C_{\text{lig}}$<br>[mol/dm <sup>3</sup> ] | $\Lambda_m$<br>[S·cm <sup>2</sup> ·mol <sup>-1</sup> ] |
| 1.                          | 0.00307                                     | 0.00000                                    | 65.0203                                                |
| 2.                          | 0.00300                                     | 0.00030                                    | 64.9480                                                |
| 3.                          | 0.00293                                     | 0.00061                                    | 64.8573                                                |
| 4.                          | 0.00286                                     | 0.00090                                    | 64.7965                                                |
| 5.                          | 0.00279                                     | 0.00120                                    | 64.7098                                                |
| 6.                          | 0.00272                                     | 0.00148                                    | 64.6127                                                |
| 7.                          | 0.00265                                     | 0.00181                                    | 64.5253                                                |
| 8.                          | 0.00258                                     | 0.00209                                    | 64.4696                                                |

|     |         |         |         |
|-----|---------|---------|---------|
| 9.  | 0.00251 | 0.00239 | 64.3758 |
| 10. | 0.00245 | 0.00269 | 64.3101 |
| 11. | 0.00238 | 0.00298 | 64.2280 |
| 12. | 0.00231 | 0.00329 | 64.1500 |
| 13. | 0.00224 | 0.00358 | 64.0785 |
| 14. | 0.00217 | 0.00388 | 64.0065 |
| 15. | 0.00210 | 0.00417 | 63.9536 |
| 16. | 0.00203 | 0.00448 | 63.8866 |
| 17. | 0.00196 | 0.00477 | 63.8303 |
| 18. | 0.00189 | 0.00507 | 63.7974 |
| 19. | 0.00183 | 0.00535 | 63.7501 |
| 20. | 0.00175 | 0.00566 | 63.7050 |
| 21. | 0.00168 | 0.00596 | 63.6602 |
| 22. | 0.00162 | 0.00624 | 63.6281 |
| 23. | 0.00156 | 0.00651 | 63.6284 |

**Table S10.** The value of molar concentration of salt  $C_{\text{salt}}$  [mol/dm<sup>3</sup>], concentration of ligand  $C_{\text{lig}}$  [mol/dm<sup>3</sup>], molar conductivity  $\Lambda$  [S·cm<sup>2</sup>·mol<sup>-1</sup>] for  $\alpha$ -cyclodextrin with caffeic acid sodium salt at a given molar fraction of water ( $x_w$ ) in water at T = 303.15K.

| Sodium Salt of Caffeic Acid |                                             |                                            |                                                        |
|-----------------------------|---------------------------------------------|--------------------------------------------|--------------------------------------------------------|
| Nr                          | $C_{\text{salt}}$<br>[mol/dm <sup>3</sup> ] | $C_{\text{lig}}$<br>[mol/dm <sup>3</sup> ] | $\Lambda_m$<br>[S·cm <sup>2</sup> ·mol <sup>-1</sup> ] |
| 1.                          | 0.00301                                     | 0.00000                                    | 72.2700                                                |
| 2.                          | 0.00294                                     | 0.00030                                    | 72.2354                                                |
| 3.                          | 0.00287                                     | 0.00060                                    | 72.1743                                                |
| 4.                          | 0.00280                                     | 0.00092                                    | 72.1064                                                |
| 5.                          | 0.00273                                     | 0.00120                                    | 72.0429                                                |
| 6.                          | 0.00266                                     | 0.00150                                    | 71.9858                                                |
| 7.                          | 0.00260                                     | 0.00179                                    | 71.9003                                                |
| 8.                          | 0.00253                                     | 0.00210                                    | 71.8150                                                |
| 9.                          | 0.00246                                     | 0.00238                                    | 71.7606                                                |
| 10.                         | 0.00239                                     | 0.00270                                    | 71.6744                                                |
| 11.                         | 0.00233                                     | 0.00298                                    | 71.5638                                                |
| 12.                         | 0.00225                                     | 0.00329                                    | 71.4875                                                |
| 13.                         | 0.00219                                     | 0.00357                                    | 71.4129                                                |
| 14.                         | 0.00212                                     | 0.00388                                    | 71.3406                                                |
| 15.                         | 0.00205                                     | 0.00417                                    | 71.2439                                                |
| 16.                         | 0.00199                                     | 0.00447                                    | 71.1817                                                |
| 17.                         | 0.001920                                    | 0.00476                                    | 71.1020                                                |
| 18.                         | 0.00185                                     | 0.00505                                    | 71.0308                                                |
| 19.                         | 0.00178                                     | 0.00535                                    | 70.9532                                                |
| 20.                         | 0.00171                                     | 0.00568                                    | 70.9071                                                |
| 21.                         | 0.00165                                     | 0.00592                                    | 70.8501                                                |
| 22.                         | 0.00158                                     | 0.006250                                   | 70.7738                                                |
| 23.                         | 0.00151                                     | 0.00653                                    | 70.7342                                                |

**Table S11.** The value of molar concentration of salt  $C_{\text{salt}}$  [mol/dm<sup>3</sup>], concentration of ligand  $C_{\text{lig}}$  [mol/dm<sup>3</sup>], molar conductivity  $\Lambda$  [S·cm<sup>2</sup>·mol<sup>-1</sup>] for  $\alpha$ -cyclodextrin with caffeic acid sodium salt at a given molar fraction of water ( $x_w$ ) in water at T = 308.15K.

| Sodium Salt of Caffeic Acid |                                             |                                            |                                                        |
|-----------------------------|---------------------------------------------|--------------------------------------------|--------------------------------------------------------|
| Nr                          | $C_{\text{salt}}$<br>[mol/dm <sup>3</sup> ] | $C_{\text{lig}}$<br>[mol/dm <sup>3</sup> ] | $\Lambda_m$<br>[S·cm <sup>2</sup> ·mol <sup>-1</sup> ] |
| 1.                          | 0.00286                                     | 0.00000                                    | 80.0335                                                |
| 2.                          | 0.00281                                     | 0.00030                                    | 78.7602                                                |
| 3.                          | 0.00275                                     | 0.00059                                    | 77.4504                                                |
| 4.                          | 0.00269                                     | 0.00089                                    | 76.1828                                                |
| 5.                          | 0.00264                                     | 0.00117                                    | 75.0257                                                |
| 6.                          | 0.00258                                     | 0.00148                                    | 73.9011                                                |
| 7.                          | 0.00253                                     | 0.00177                                    | 72.8803                                                |
| 8.                          | 0.00247                                     | 0.00207                                    | 71.9121                                                |
| 9.                          | 0.00241                                     | 0.00236                                    | 70.9211                                                |
| 10.                         | 0.00236                                     | 0.00266                                    | 70.0745                                                |
| 11.                         | 0.00230                                     | 0.00296                                    | 69.4215                                                |
| 12.                         | 0.00224                                     | 0.00326                                    | 68.6922                                                |
| 13.                         | 0.00219                                     | 0.00355                                    | 68.1558                                                |
| 14.                         | 0.00213                                     | 0.00384                                    | 67.6654                                                |
| 15.                         | 0.00208                                     | 0.00415                                    | 67.2330                                                |
| 16.                         | 0.00202                                     | 0.00444                                    | 66.9645                                                |
| 17.                         | 0.00196                                     | 0.00473                                    | 66.6679                                                |
| 18.                         | 0.00191                                     | 0.00502                                    | 66.4792                                                |
| 19.                         | 0.00186                                     | 0.00530                                    | 66.1728                                                |
| 20.                         | 0.00180                                     | 0.00561                                    | 65.9744                                                |
| 21.                         | 0.00174                                     | 0.00590                                    | 65.7143                                                |
| 22.                         | 0.00169                                     | 0.00619                                    | 65.5805                                                |
| 23.                         | 0.00163                                     | 0.00649                                    | 65.4244                                                |

**Table S12.** The value of molar concentration of salt  $C_{\text{salt}}$  [mol/dm<sup>3</sup>], concentration of ligand  $C_{\text{lig}}$  [mol/dm<sup>3</sup>], molar conductivity  $\Lambda$  [S·cm<sup>2</sup>·mol<sup>-1</sup>] for  $\alpha$ -cyclodextrin with coumaric acid sodium salt at a given molar fraction of water ( $x_w$ ) in water at T = 288.15K.

| Sodium Salt of Coumaric Acid |                                             |                                            |                                                        |
|------------------------------|---------------------------------------------|--------------------------------------------|--------------------------------------------------------|
| Nr                           | $C_{\text{salt}}$<br>[mol/dm <sup>3</sup> ] | $C_{\text{lig}}$<br>[mol/dm <sup>3</sup> ] | $\Lambda_m$<br>[S·cm <sup>2</sup> ·mol <sup>-1</sup> ] |
| 1.                           | 0.00291                                     | 0.00000                                    | 58.1464                                                |
| 2.                           | 0.00284                                     | 0.00030                                    | 57.9332                                                |
| 3.                           | 0.00277                                     | 0.00060                                    | 57.7233                                                |
| 4.                           | 0.00271                                     | 0.00091                                    | 57.5203                                                |
| 5.                           | 0.00264                                     | 0.00119                                    | 57.2468                                                |
| 6.                           | 0.00258                                     | 0.00149                                    | 56.9505                                                |
| 7.                           | 0.00251                                     | 0.00179                                    | 56.7181                                                |
| 8.                           | 0.00244                                     | 0.00212                                    | 56.4919                                                |
| 9.                           | 0.00238                                     | 0.00239                                    | 56.2914                                                |
| 10.                          | 0.00231                                     | 0.00270                                    | 56.1217                                                |
| 11.                          | 0.00225                                     | 0.00297                                    | 56.0039                                                |
| 12.                          | 0.00218                                     | 0.00329                                    | 55.8160                                                |
| 13.                          | 0.00212                                     | 0.00357                                    | 55.7434                                                |
| 14.                          | 0.00205                                     | 0.00388                                    | 55.6168                                                |
| 15.                          | 0.00199                                     | 0.00417                                    | 55.4599                                                |
| 16.                          | 0.00192                                     | 0.00447                                    | 55.3430                                                |

|     |         |         |         |
|-----|---------|---------|---------|
| 17. | 0.00185 | 0.00477 | 55.2500 |
| 18. | 0.00179 | 0.00507 | 55.2037 |
| 19. | 0.00172 | 0.00537 | 55.1576 |
| 20. | 0.00165 | 0.00569 | 55.0964 |
| 21. | 0.00159 | 0.00595 | 55.0929 |
| 22. | 0.00153 | 0.00625 | 55.1204 |
| 23. | 0.00146 | 0.00655 | 55.1342 |

**Table S13.** The value of molar concentration of salt  $C_{\text{salt}}$  [mol/dm<sup>3</sup>], concentration of ligand  $C_{\text{lig}}$  [mol/dm<sup>3</sup>], molar conductivity  $\Lambda$  [S·cm<sup>2</sup>·mol<sup>-1</sup>] for  $\alpha$ -cyclodextrin with coumaric acid sodium salt at a given molar fraction of water ( $x_w$ ) in water at T = 293.15K.

| Sodium Salt of Coumaric Acid |                                             |                                            |                                                        |
|------------------------------|---------------------------------------------|--------------------------------------------|--------------------------------------------------------|
| Nr                           | $C_{\text{salt}}$<br>[mol/dm <sup>3</sup> ] | $C_{\text{lig}}$<br>[mol/dm <sup>3</sup> ] | $\Lambda_m$<br>[S·cm <sup>2</sup> ·mol <sup>-1</sup> ] |
| 1.                           | 0.00290                                     | 0.00000                                    | 65.5592                                                |
| 2.                           | 0.00283                                     | 0.00030                                    | 65.4264                                                |
| 3.                           | 0.00276                                     | 0.00060                                    | 65.1598                                                |
| 4.                           | 0.00270                                     | 0.00089                                    | 64.9703                                                |
| 5.                           | 0.00263                                     | 0.00119                                    | 64.7497                                                |
| 6.                           | 0.00256                                     | 0.00149                                    | 64.5080                                                |
| 7.                           | 0.00250                                     | 0.00179                                    | 64.2783                                                |
| 8.                           | 0.00243                                     | 0.00211                                    | 64.0618                                                |
| 9.                           | 0.00237                                     | 0.00239                                    | 63.8294                                                |
| 10.                          | 0.00230                                     | 0.00269                                    | 63.6454                                                |
| 11.                          | 0.00223                                     | 0.00299                                    | 63.4610                                                |
| 12.                          | 0.00217                                     | 0.00327                                    | 63.2929                                                |
| 13.                          | 0.00210                                     | 0.00359                                    | 63.1001                                                |
| 14.                          | 0.00204                                     | 0.00387                                    | 62.9515                                                |
| 15.                          | 0.00197                                     | 0.00418                                    | 62.8009                                                |
| 16.                          | 0.00190                                     | 0.00449                                    | 62.6120                                                |
| 17.                          | 0.00184                                     | 0.00477                                    | 62.4731                                                |
| 18.                          | 0.00178                                     | 0.00507                                    | 62.3228                                                |
| 19.                          | 0.00171                                     | 0.00536                                    | 62.1972                                                |
| 20.                          | 0.00165                                     | 0.00565                                    | 62.0239                                                |
| 21.                          | 0.00158                                     | 0.00596                                    | 61.9179                                                |
| 22.                          | 0.00152                                     | 0.00624                                    | 61.8520                                                |
| 23.                          | 0.00145                                     | 0.00655                                    | 61.7362                                                |

**Table S14.** The value of molar concentration of salt  $C_{\text{salt}}$  [mol/dm<sup>3</sup>], concentration of ligand  $C_{\text{lig}}$  [mol/dm<sup>3</sup>], molar conductivity  $\Lambda$  [S·cm<sup>2</sup>·mol<sup>-1</sup>] for  $\alpha$ -cyclodextrin with coumaric acid sodium salt at a given molar fraction of water ( $x_w$ ) in water at T = 288.15K.

| Sodium Salt of Coumaric Acid |                                             |                                            |                                                        |
|------------------------------|---------------------------------------------|--------------------------------------------|--------------------------------------------------------|
| Nr                           | $C_{\text{salt}}$<br>[mol/dm <sup>3</sup> ] | $C_{\text{lig}}$<br>[mol/dm <sup>3</sup> ] | $\Lambda_m$<br>[S·cm <sup>2</sup> ·mol <sup>-1</sup> ] |
| 1.                           | 0.00289                                     | 0.00000                                    | 73.8331                                                |
| 2.                           | 0.00282                                     | 0.00031                                    | 73.6059                                                |
| 3.                           | 0.00276                                     | 0.00059                                    | 73.3532                                                |
| 4.                           | 0.00269                                     | 0.00091                                    | 73.0815                                                |
| 5.                           | 0.00262                                     | 0.00121                                    | 72.7960                                                |
| 6.                           | 0.00256                                     | 0.00149                                    | 72.5252                                                |
| 7.                           | 0.00249                                     | 0.00180                                    | 72.3323                                                |
| 8.                           | 0.00243                                     | 0.00208                                    | 72.0969                                                |



|     |         |         |         |
|-----|---------|---------|---------|
| 9.  | 0.00236 | 0.00241 | 71.8773 |
| 10. | 0.00230 | 0.00267 | 71.7017 |
| 11. | 0.00223 | 0.00300 | 71.5864 |
| 12. | 0.00217 | 0.00328 | 71.4389 |
| 13. | 0.00210 | 0.00357 | 71.3077 |
| 14. | 0.00204 | 0.00386 | 71.1868 |
| 15. | 0.00197 | 0.00417 | 71.0388 |
| 16. | 0.00190 | 0.00448 | 70.9094 |
| 17. | 0.00184 | 0.00477 | 70.8220 |
| 18. | 0.00177 | 0.00506 | 70.7068 |
| 19. | 0.00171 | 0.00536 | 70.6333 |
| 20. | 0.00164 | 0.00565 | 70.5678 |
| 21. | 0.00158 | 0.00594 | 70.5123 |
| 22. | 0.00152 | 0.00622 | 70.5086 |
| 23. | 0.00145 | 0.00655 | 70.4987 |

**Table S15.** The value of molar concentration of salt  $C_{\text{salt}}$  [mol/dm<sup>3</sup>], concentration of ligand  $C_{\text{lig}}$  [mol/dm<sup>3</sup>], molar conductivity  $\Lambda$  [S·cm<sup>2</sup>·mol<sup>-1</sup>] for  $\alpha$ -cyclodextrin with coumaric acid sodium salt at a given molar fraction of water ( $x_w$ ) in water at T = 303.15K.

| Sodium Salt of Coumaric Acid |                                             |                                            |                                                        |
|------------------------------|---------------------------------------------|--------------------------------------------|--------------------------------------------------------|
| Nr                           | $C_{\text{salt}}$<br>[mol/dm <sup>3</sup> ] | $C_{\text{lig}}$<br>[mol/dm <sup>3</sup> ] | $\Lambda_m$<br>[S·cm <sup>2</sup> ·mol <sup>-1</sup> ] |
| 1.                           | 0.00286                                     | 0.00000                                    | 82.9025                                                |
| 2.                           | 0.00280                                     | 0.00030                                    | 82.7329                                                |
| 3.                           | 0.00273                                     | 0.00059                                    | 82.5551                                                |
| 4.                           | 0.00266                                     | 0.00090                                    | 82.3417                                                |
| 5.                           | 0.00260                                     | 0.00118                                    | 82.1579                                                |
| 6.                           | 0.00253                                     | 0.00150                                    | 81.9304                                                |
| 7.                           | 0.00247                                     | 0.00178                                    | 81.7001                                                |
| 8.                           | 0.00241                                     | 0.00207                                    | 81.4729                                                |
| 9.                           | 0.00235                                     | 0.00235                                    | 81.3165                                                |
| 10.                          | 0.00227                                     | 0.00269                                    | 81.0895                                                |
| 11.                          | 0.00221                                     | 0.00297                                    | 80.8302                                                |
| 12.                          | 0.00215                                     | 0.00328                                    | 80.6582                                                |
| 13.                          | 0.00208                                     | 0.00359                                    | 80.4229                                                |
| 14.                          | 0.00202                                     | 0.00387                                    | 80.2708                                                |
| 15.                          | 0.00195                                     | 0.00416                                    | 80.1315                                                |
| 16.                          | 0.00189                                     | 0.00446                                    | 79.9890                                                |
| 17.                          | 0.00182                                     | 0.00475                                    | 79.8177                                                |
| 18.                          | 0.00176                                     | 0.00505                                    | 79.6976                                                |
| 19.                          | 0.00169                                     | 0.00534                                    | 79.6003                                                |
| 20.                          | 0.00163                                     | 0.00564                                    | 79.5004                                                |
| 21.                          | 0.00157                                     | 0.00593                                    | 79.4233                                                |
| 22.                          | 0.00150                                     | 0.00623                                    | 79.3035                                                |
| 23.                          | 0.00144                                     | 0.00652                                    | 79.2098                                                |

**Table S16.** The value of molar concentration of salt  $C_{\text{salt}}$  [mol/dm<sup>3</sup>], concentration of ligand  $C_{\text{lig}}$  [mol/dm<sup>3</sup>], molar conductivity  $\Lambda$  [S·cm<sup>2</sup>·mol<sup>-1</sup>] for  $\alpha$ -cyclodextrin with coumaric acid sodium salt at a given molar fraction of water ( $x_w$ ) in water at T = 308.15K.

| Sodium Salt of Coumaric Acid |                                             |                                            |                                                        |
|------------------------------|---------------------------------------------|--------------------------------------------|--------------------------------------------------------|
| Nr                           | $C_{\text{salt}}$<br>[mol/dm <sup>3</sup> ] | $C_{\text{lig}}$<br>[mol/dm <sup>3</sup> ] | $\Lambda_m$<br>[S·cm <sup>2</sup> ·mol <sup>-1</sup> ] |
| 1.                           | 0.00287                                     | 0.00000                                    | 91.4678                                                |
| 2.                           | 0.00281                                     | 0.00030                                    | 90.4764                                                |
| 3.                           | 0.00276                                     | 0.00058                                    | 89.4751                                                |
| 4.                           | 0.00270                                     | 0.00088                                    | 88.4211                                                |
| 5.                           | 0.00264                                     | 0.00121                                    | 87.2897                                                |
| 6.                           | 0.00259                                     | 0.00148                                    | 86.4214                                                |
| 7.                           | 0.00253                                     | 0.00178                                    | 85.4925                                                |
| 8.                           | 0.00248                                     | 0.00207                                    | 84.8512                                                |
| 9.                           | 0.00242                                     | 0.00237                                    | 84.1682                                                |
| 10.                          | 0.00236                                     | 0.00266                                    | 83.5240                                                |
| 11.                          | 0.00231                                     | 0.00294                                    | 82.9965                                                |
| 12.                          | 0.00225                                     | 0.00324                                    | 82.4612                                                |
| 13.                          | 0.00220                                     | 0.00354                                    | 81.9742                                                |
| 14.                          | 0.00214                                     | 0.00385                                    | 81.5703                                                |
| 15.                          | 0.00208                                     | 0.00416                                    | 81.2281                                                |
| 16.                          | 0.00202                                     | 0.00446                                    | 80.9890                                                |
| 17.                          | 0.00197                                     | 0.00475                                    | 80.7371                                                |
| 18.                          | 0.00191                                     | 0.00504                                    | 80.5666                                                |
| 19.                          | 0.00185                                     | 0.00534                                    | 80.3380                                                |
| 20.                          | 0.00180                                     | 0.00563                                    | 80.1666                                                |
| 21.                          | 0.00174                                     | 0.00592                                    | 80.0525                                                |
| 22.                          | 0.00168                                     | 0.00623                                    | 79.8933                                                |
| 23.                          | 0.00163                                     | 0.00651                                    | 79.7827                                                |

**Table S17.** The value of molar concentration of salt  $C_{\text{salt}}$  [mol/dm<sup>3</sup>], concentration of ligand  $C_{\text{lig}}$  [mol/dm<sup>3</sup>], molar conductivity  $\Lambda$  [S·cm<sup>2</sup>·mol<sup>-1</sup>] for  $\alpha$ -cyclodextrin with ferulic acid sodium salt at a given molar fraction of water ( $x_w$ ) in water at T = 288.15K.

| Sodium Salt of Ferulic Acid |                                             |                                            |                                                        |
|-----------------------------|---------------------------------------------|--------------------------------------------|--------------------------------------------------------|
| Nr                          | $C_{\text{salt}}$<br>[mol/dm <sup>3</sup> ] | $C_{\text{lig}}$<br>[mol/dm <sup>3</sup> ] | $\Lambda_m$<br>[S·cm <sup>2</sup> ·mol <sup>-1</sup> ] |
| 1.                          | 0.00309                                     | 0.00000                                    | 48.1272                                                |
| 2.                          | 0.00302                                     | 0.00031                                    | 48.0063                                                |
| 3.                          | 0.00295                                     | 0.00061                                    | 47.9410                                                |
| 4.                          | 0.00288                                     | 0.00091                                    | 47.8536                                                |
| 5.                          | 0.00281                                     | 0.00121                                    | 47.7667                                                |
| 6.                          | 0.00274                                     | 0.00151                                    | 47.6867                                                |
| 7.                          | 0.00267                                     | 0.00181                                    | 47.5717                                                |
| 8.                          | 0.00260                                     | 0.00212                                    | 47.4873                                                |
| 9.                          | 0.00253                                     | 0.00240                                    | 47.3953                                                |
| 10.                         | 0.00247                                     | 0.00269                                    | 47.3207                                                |
| 11.                         | 0.00240                                     | 0.00299                                    | 47.2326                                                |
| 12.                         | 0.00232                                     | 0.00329                                    | 47.1449                                                |
| 13.                         | 0.00226                                     | 0.00359                                    | 47.0968                                                |
| 14.                         | 0.00219                                     | 0.00388                                    | 47.0503                                                |
| 15.                         | 0.00212                                     | 0.00418                                    | 46.9952                                                |
| 16.                         | 0.00205                                     | 0.00449                                    | 46.9294                                                |

|     |         |         |         |
|-----|---------|---------|---------|
| 17. | 0.00198 | 0.00478 | 46.8883 |
| 18. | 0.00191 | 0.00507 | 46.8433 |
| 19. | 0.00184 | 0.00537 | 46.8156 |
| 20. | 0.00177 | 0.00565 | 46.7838 |
| 21. | 0.00170 | 0.00598 | 46.7457 |
| 22. | 0.00163 | 0.00627 | 46.7256 |
| 23. | 0.00157 | 0.00654 | 46.6842 |

**Table S18.** The value of molar concentration of salt  $C_{\text{salt}}$  [mol/dm<sup>3</sup>], concentration of ligand  $C_{\text{lig}}$  [mol/dm<sup>3</sup>], molar conductivity  $\Lambda$  [S·cm<sup>2</sup>·mol<sup>-1</sup>] for  $\alpha$ -cyclodextrin with ferulic acid sodium salt at a given molar fraction of water ( $x_w$ ) in water at T = 293.15K.

| Sodium Salt of Ferulic Acid |                                             |                                            |                                                        |
|-----------------------------|---------------------------------------------|--------------------------------------------|--------------------------------------------------------|
| Nr                          | $C_{\text{salt}}$<br>[mol/dm <sup>3</sup> ] | $C_{\text{lig}}$<br>[mol/dm <sup>3</sup> ] | $\Lambda_m$<br>[S·cm <sup>2</sup> ·mol <sup>-1</sup> ] |
| 1.                          | 0.00315                                     | 0.00000                                    | 54.6693                                                |
| 2.                          | 0.00307                                     | 0.00031                                    | 54.5096                                                |
| 3.                          | 0.00300                                     | 0.00062                                    | 54.4267                                                |
| 4.                          | 0.00292                                     | 0.00093                                    | 54.3564                                                |
| 5.                          | 0.00286                                     | 0.00121                                    | 54.2878                                                |
| 6.                          | 0.00279                                     | 0.00149                                    | 54.2188                                                |
| 7.                          | 0.00272                                     | 0.00180                                    | 54.1584                                                |
| 8.                          | 0.00264                                     | 0.00210                                    | 54.0794                                                |
| 9.                          | 0.00257                                     | 0.00240                                    | 54.0304                                                |
| 10.                         | 0.00250                                     | 0.00269                                    | 53.9411                                                |
| 11.                         | 0.00243                                     | 0.00299                                    | 53.8733                                                |
| 12.                         | 0.00236                                     | 0.00330                                    | 53.7789                                                |
| 13.                         | 0.00229                                     | 0.00358                                    | 53.7073                                                |
| 14.                         | 0.00222                                     | 0.00388                                    | 53.6208                                                |
| 15.                         | 0.00215                                     | 0.00418                                    | 53.5545                                                |
| 16.                         | 0.00208                                     | 0.00448                                    | 53.4780                                                |
| 17.                         | 0.00201                                     | 0.00476                                    | 53.4339                                                |
| 18.                         | 0.00193                                     | 0.00507                                    | 53.3850                                                |
| 19.                         | 0.00186                                     | 0.00536                                    | 53.3599                                                |
| 20.                         | 0.00179                                     | 0.00566                                    | 53.3377                                                |
| 21.                         | 0.00172                                     | 0.00596                                    | 53.3265                                                |
| 22.                         | 0.00165                                     | 0.00624                                    | 53.3121                                                |
| 23.                         | 0.00159                                     | 0.00651                                    | 53.3025                                                |

**Table S19.** The value of molar concentration of salt  $C_{\text{salt}}$  [mol/dm<sup>3</sup>], concentration of ligand  $C_{\text{lig}}$  [mol/dm<sup>3</sup>], molar conductivity  $\Lambda$  [S·cm<sup>2</sup>·mol<sup>-1</sup>] for  $\alpha$ -cyclodextrin with ferulic acid sodium salt at a given molar fraction of water ( $x_w$ ) in water at T = 298.15K.

| Sodium Salt of Ferulic Acid |                                             |                                            |                                                        |
|-----------------------------|---------------------------------------------|--------------------------------------------|--------------------------------------------------------|
| Nr                          | $C_{\text{salt}}$<br>[mol/dm <sup>3</sup> ] | $C_{\text{lig}}$<br>[mol/dm <sup>3</sup> ] | $\Lambda_m$<br>[S·cm <sup>2</sup> ·mol <sup>-1</sup> ] |
| 1.                          | 0.00311                                     | 0.00000                                    | 61.7905                                                |
| 2.                          | 0.00305                                     | 0.00027                                    | 61.7204                                                |
| 3.                          | 0.00297                                     | 0.00061                                    | 61.5883                                                |
| 4.                          | 0.00290                                     | 0.00090                                    | 61.4823                                                |
| 5.                          | 0.00283                                     | 0.00120                                    | 61.3822                                                |
| 6.                          | 0.00276                                     | 0.00150                                    | 61.2979                                                |
| 7.                          | 0.00269                                     | 0.00180                                    | 61.1908                                                |
| 8.                          | 0.00262                                     | 0.00210                                    | 61.1202                                                |

|     |         |         |         |
|-----|---------|---------|---------|
| 9.  | 0.00255 | 0.00239 | 61.0575 |
| 10. | 0.00248 | 0.00269 | 60.9855 |
| 11. | 0.00241 | 0.00300 | 60.9225 |
| 12. | 0.00234 | 0.00328 | 60.8625 |
| 13. | 0.00227 | 0.00358 | 60.8006 |
| 14. | 0.00220 | 0.00387 | 60.7442 |
| 15. | 0.00213 | 0.00417 | 60.6702 |
| 16. | 0.00206 | 0.00447 | 60.5894 |
| 17. | 0.00199 | 0.00477 | 60.5316 |
| 18. | 0.00192 | 0.00506 | 60.4555 |
| 19. | 0.00185 | 0.00538 | 60.4059 |
| 20. | 0.00178 | 0.00566 | 60.3825 |
| 21. | 0.00171 | 0.00594 | 60.3462 |
| 22. | 0.00165 | 0.00621 | 60.2849 |
| 23. | 0.00158 | 0.00650 | 60.2664 |

**Table S20.** The value of molar concentration of salt  $C_{\text{salt}}$  [mol/dm<sup>3</sup>], concentration of ligand  $C_{\text{lig}}$  [mol/dm<sup>3</sup>], molar conductivity  $\Lambda$  [S·cm<sup>2</sup>·mol<sup>-1</sup>] for  $\alpha$ -cyclodextrin with ferulic acid sodium salt at a given molar fraction of water ( $x_w$ ) in water at T = 303.15K.

| Sodium Salt of Ferulic Acid |                                             |                                            |                                                        |
|-----------------------------|---------------------------------------------|--------------------------------------------|--------------------------------------------------------|
| Nr                          | $C_{\text{salt}}$<br>[mol/dm <sup>3</sup> ] | $C_{\text{lig}}$<br>[mol/dm <sup>3</sup> ] | $\Lambda_m$<br>[S·cm <sup>2</sup> ·mol <sup>-1</sup> ] |
| 1.                          | 0.00315                                     | 0.00000                                    | 68.2239                                                |
| 2.                          | 0.00308                                     | 0.00031                                    | 67.3534                                                |
| 3.                          | 0.00301                                     | 0.00060                                    | 66.5502                                                |
| 4.                          | 0.00293                                     | 0.00092                                    | 65.7565                                                |
| 5.                          | 0.00286                                     | 0.00121                                    | 65.0636                                                |
| 6.                          | 0.00279                                     | 0.00149                                    | 64.3062                                                |
| 7.                          | 0.00272                                     | 0.00179                                    | 63.6592                                                |
| 8.                          | 0.00265                                     | 0.00209                                    | 62.9865                                                |
| 9.                          | 0.00258                                     | 0.00239                                    | 62.4143                                                |
| 10.                         | 0.00251                                     | 0.00269                                    | 61.9531                                                |
| 11.                         | 0.00244                                     | 0.00299                                    | 61.4591                                                |
| 12.                         | 0.00237                                     | 0.00328                                    | 61.0355                                                |
| 13.                         | 0.00230                                     | 0.00358                                    | 60.6761                                                |
| 14.                         | 0.00223                                     | 0.00388                                    | 60.3862                                                |
| 15.                         | 0.00216                                     | 0.00417                                    | 60.0971                                                |
| 16.                         | 0.00208                                     | 0.00447                                    | 59.8251                                                |
| 17.                         | 0.00201                                     | 0.00476                                    | 59.6954                                                |
| 18.                         | 0.00194                                     | 0.00506                                    | 59.4812                                                |
| 19.                         | 0.00187                                     | 0.00535                                    | 59.3611                                                |
| 20.                         | 0.00180                                     | 0.00564                                    | 59.3122                                                |
| 21.                         | 0.00173                                     | 0.00594                                    | 59.2907                                                |
| 22.                         | 0.00167                                     | 0.00622                                    | 59.2558                                                |
| 23.                         | 0.00159                                     | 0.00652                                    | 59.2256                                                |

**Table S21.** The value of molar concentration of salt  $C_{\text{salt}}$  [mol/dm<sup>3</sup>], concentration of ligand  $C_{\text{lig}}$  [mol/dm<sup>3</sup>], molar conductivity  $\Lambda$  [S·cm<sup>2</sup>·mol<sup>-1</sup>] for  $\alpha$ -cyclodextrin with ferulic acid sodium salt at a given molar fraction of water ( $x_w$ ) in water at T = 308.15K.

| Sodium Salt of Ferulic Acid |                                             |                                            |                                                        |
|-----------------------------|---------------------------------------------|--------------------------------------------|--------------------------------------------------------|
| Nr                          | $C_{\text{salt}}$<br>[mol/dm <sup>3</sup> ] | $C_{\text{lig}}$<br>[mol/dm <sup>3</sup> ] | $\Lambda_m$<br>[S·cm <sup>2</sup> ·mol <sup>-1</sup> ] |
| 1.                          | 0.00293                                     | 0.00000                                    | 74.8039                                                |
| 2.                          | 0.00287                                     | 0.00030                                    | 73.9334                                                |
| 3.                          | 0.00281                                     | 0.00060                                    | 73.1302                                                |
| 4.                          | 0.00275                                     | 0.00090                                    | 72.3365                                                |
| 5.                          | 0.00270                                     | 0.00118                                    | 71.6436                                                |
| 6.                          | 0.00264                                     | 0.00149                                    | 70.8862                                                |
| 7.                          | 0.00258                                     | 0.00179                                    | 70.2392                                                |
| 8.                          | 0.00252                                     | 0.00208                                    | 69.5665                                                |
| 9.                          | 0.00246                                     | 0.00238                                    | 68.9943                                                |
| 10.                         | 0.00241                                     | 0.00266                                    | 68.5331                                                |
| 11.                         | 0.00235                                     | 0.00296                                    | 68.0391                                                |
| 12.                         | 0.00229                                     | 0.00326                                    | 67.6155                                                |
| 13.                         | 0.00223                                     | 0.00356                                    | 67.2561                                                |
| 14.                         | 0.00217                                     | 0.00385                                    | 66.9662                                                |
| 15.                         | 0.00211                                     | 0.00415                                    | 66.6771                                                |
| 16.                         | 0.00205                                     | 0.00444                                    | 66.4051                                                |
| 17.                         | 0.00199                                     | 0.00474                                    | 66.2754                                                |
| 18.                         | 0.00194                                     | 0.00502                                    | 66.0612                                                |
| 19.                         | 0.00188                                     | 0.00532                                    | 65.9411                                                |
| 20.                         | 0.00182                                     | 0.00560                                    | 65.8922                                                |
| 21.                         | 0.00176                                     | 0.00590                                    | 65.8707                                                |
| 22.                         | 0.00171                                     | 0.00609                                    | 65.8358                                                |
| 23.                         | 0.00165                                     | 0.00648                                    | 65.8056                                                |
